# Supplementary material for: The protein resistance of silicones prepared with a PEO-silane amphiphile
Source: Royal Society of Chemistry journal article supplement (doi:10.1039/c2jm32322b), 2012-01-01
Supplement: c2jm32322b.pdf [file c2jm32322b.pdf]

## Electronic Supplementary Information

### Protein Resistance of Silicones Prepared with a PEO-Silane Amphiphile

*Department of Biomedical Engineering, Materials Science and Engineering Program,  
Texas A&M University, College Station, TX 77843-3120*

\*Corresponding author. *E-mail address:* mgrunlan@tamu.edu

**Table S1.** Adsorption of HF and BSA to films.

| wt% PEG-silane | Fibrinogen Adsorption ( $\mu\text{g}/\text{cm}^2$ ) |                   | BSA Adsorption ( $\mu\text{g}/\text{cm}^2$ ) |                   |
|----------------|-----------------------------------------------------|-------------------|----------------------------------------------|-------------------|
|                | Air-equilibrated                                    | PBS-equilibrated  | Air-equilibrated                             | PBS-equilibrated  |
| <b>0%</b>      | 0.833 $\pm$ 0.008                                   | 0.645 $\pm$ 0.026 | 0.324 $\pm$ 0.011                            | 0.176 $\pm$ 0.022 |
| <b>1%</b>      | 0.175 $\pm$ 0.038                                   | 0.009 $\pm$ 0.003 | 0.028 $\pm$ 0.003                            | 0.019 $\pm$ 0.003 |
| <b>5%</b>      | 0.006 $\pm$ 0.003                                   | -                 | -                                            | -                 |
| <b>10%</b>     | -                                                   | -                 | -                                            | -                 |
| <b>15%</b>     | 0.014 $\pm$ 0.012                                   | -                 | 0.002 $\pm$ 0.003                            | -                 |
| <b>20%</b>     | 0.009 $\pm$ 0.009                                   | -                 | 0.007 $\pm$ 0.006                            | -                 |

Air-equilibrated = conditioned in air.

PBS-equilibrated = conditioned in PBS for 24 hr.

“-“ = below the detection limit (0.003  $\mu\text{g}/\text{cm}^2$ ).
